# Supplementary material for: Major Infection Events Over 5 Years: How Is Media Coverage Influencing Online Information Needs of Health Care Professionals and the Public?
Source: PubMed Central journal article supplement (PMC3713905; doi:10.2196/jmir.2146), 2013-07-15
Supplement: jmir_v15i7e107_app1.pdf [file jmir_v15i7e107_app1.pdf]

**Multimedia Appendix 1. Supplementary figures.**

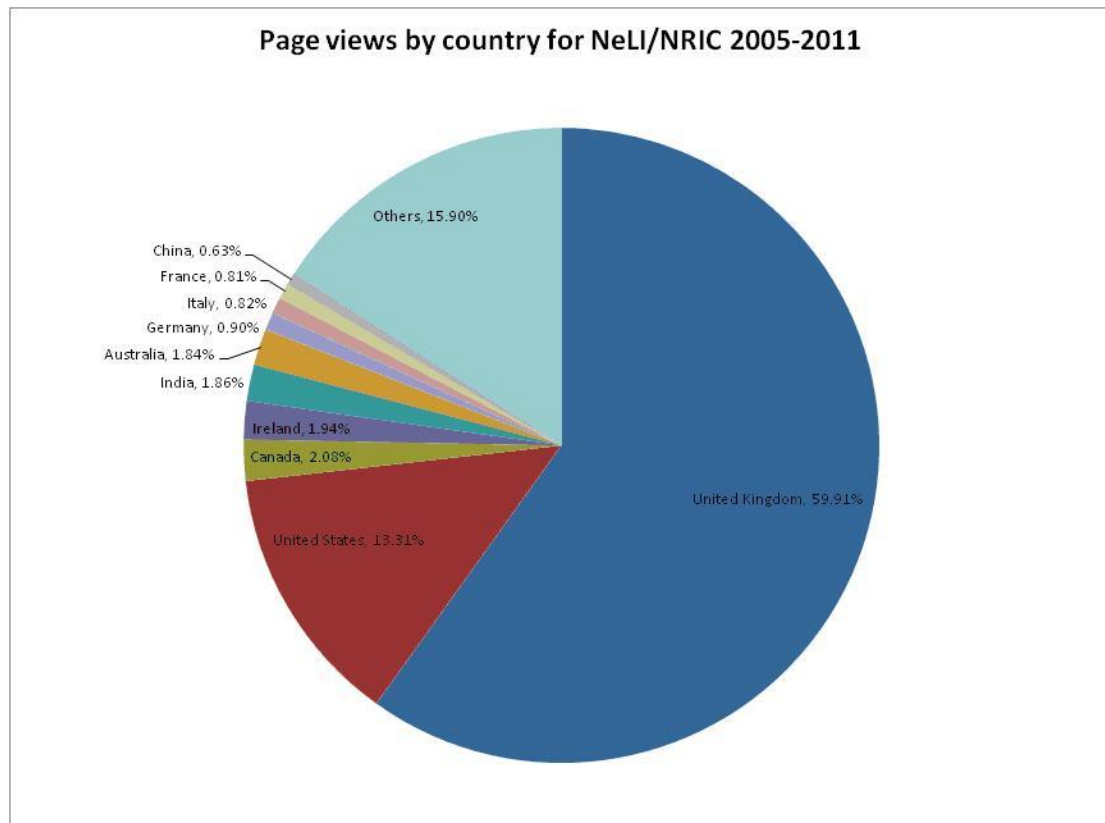

Figure 1: The combined proportion of visitors to NeLI and NRIC by location.

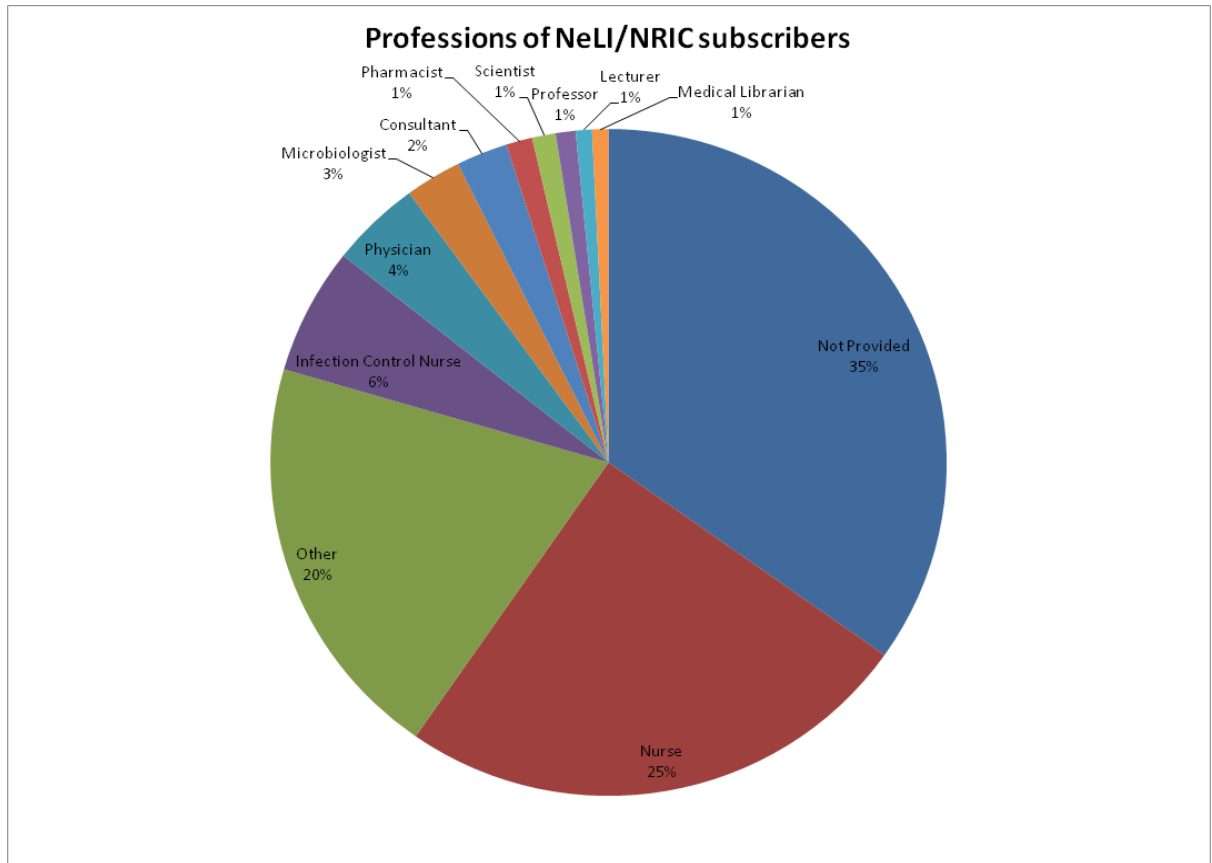

Figure 2: Details of professions provided by NeLI/NRIC subscribers.

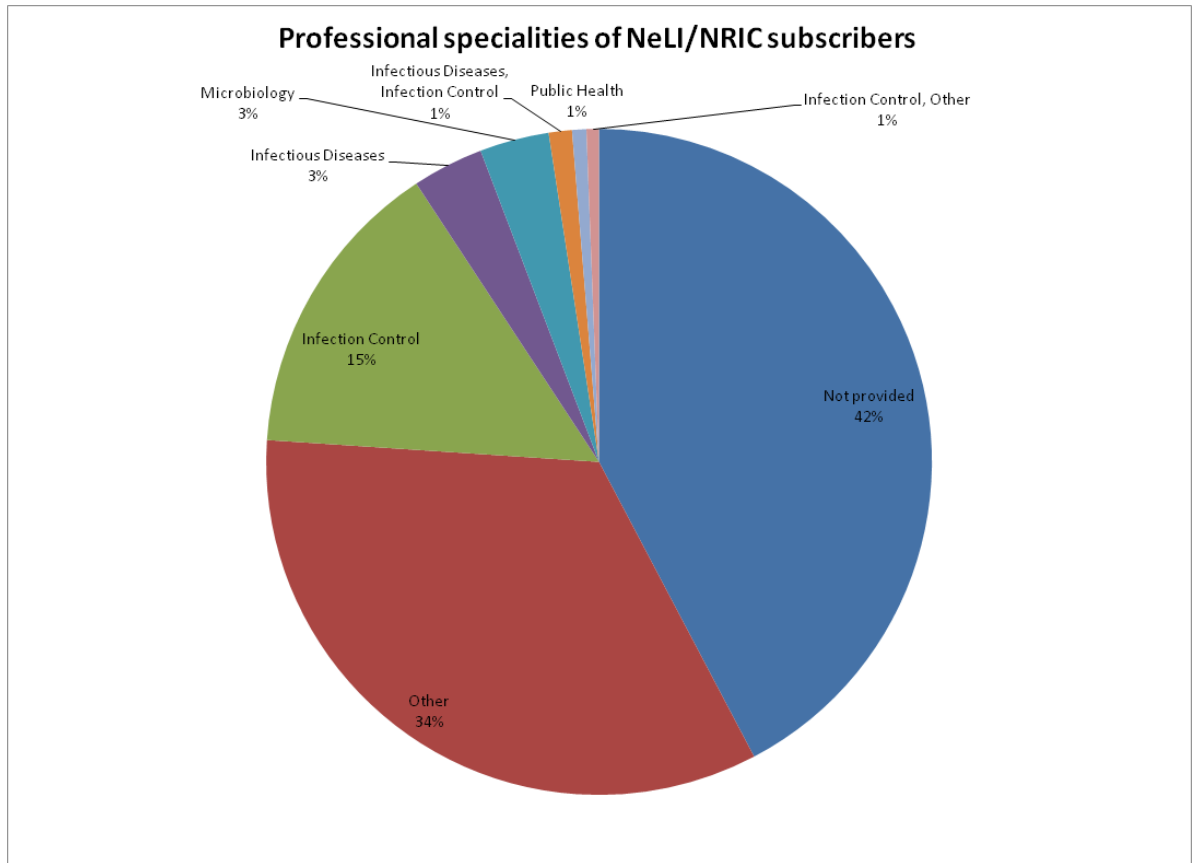

Figure 3: Details of professional specialities provided by NeLI/NRIC subscribers.

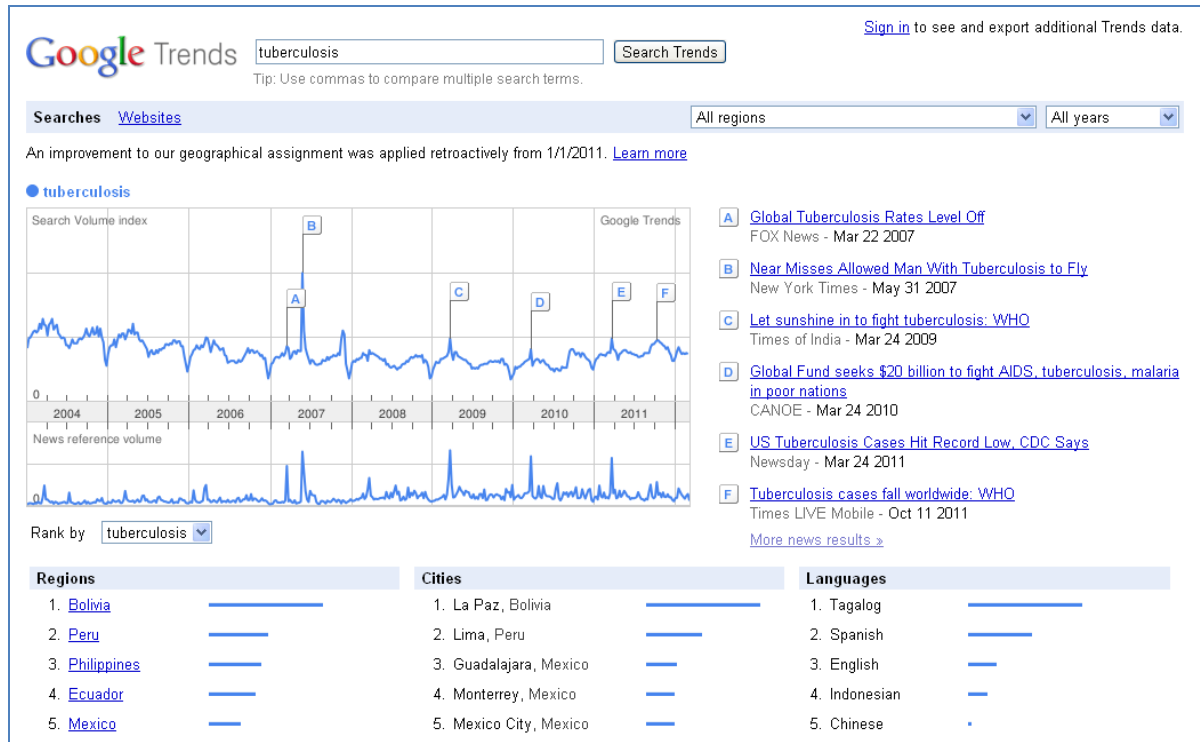

Figure 4: The Google Trends interface, showing results for the search term “tuberculosis”.

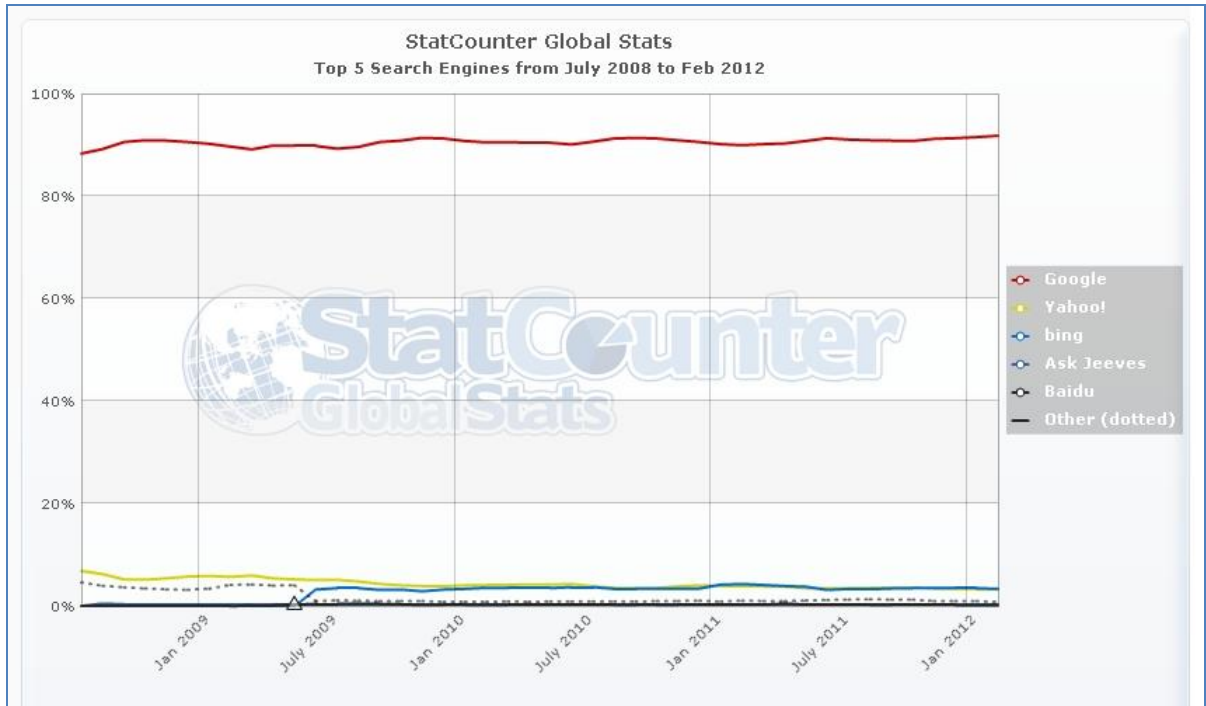

Figure 5: The monthly worldwide market share of search engines, according to StatCounter Global Stats (<http://gs.statcounter.com/>).

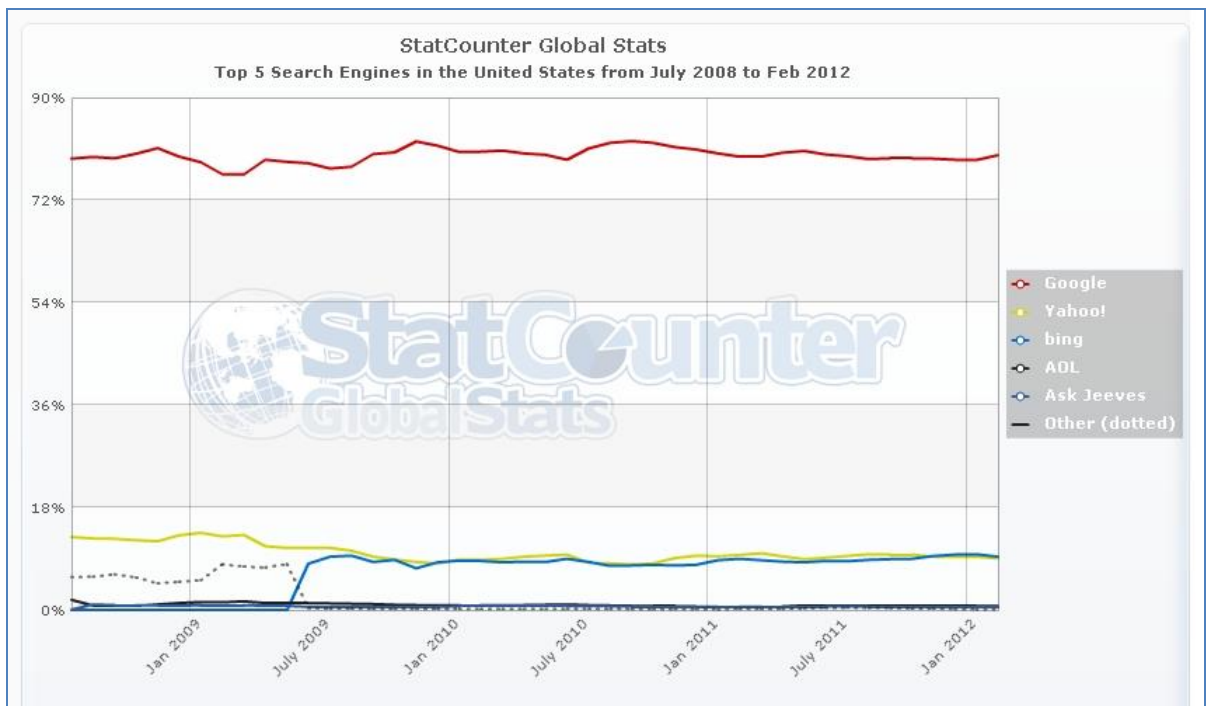

Figure 6: The monthly US market share of search engines, according to StatCounter Global Stats (<http://gs.statcounter.com/>).

Nexis® UK Start Page | Project ID: None | My Delivery Docs (0) | Preferences | Sign Out | Contact Us  
 Helpdesk: 0845 3 My Sta

**Search** Sources My Research

News Power Search Company Profiles Industry News Countries Biographies Cases All Search Forms

---

News

How do I...?  
[Search for articles where the search term appears in the headline?](#)  
[Search for two terms within the same sentence?](#)  
[Search for articles about a particular industry?](#)  
[Search for articles from a particular publication?](#)

**Show me how to...?**

Search terms:

And/or

Select topic(s)  
 Search within:   
 Tip

Don't search within:

Sources:    
 Major World Newspapers  
 ABIX - Australasian Business Intelligence  
 The Advertiser/Sunday Mail (Australia)  
 The Age (Melbourne, Australia)

Exclude Newswires  Exclude non-business articles

Duplicate Options:  [What's this?](#)

Specify date:     and

Figure 7: The LexisNexis search interface, showing a typical search for articles about the topic “norovirus”.
